# Supplementary material for: Coevolution of Eukaryote-like Vps4 and ESCRT-III Subunits in the Asgard Archaea
Source: PubMed Central journal article supplement (PMC7240154; doi:10.1128/mbio.00417-20), 2020-05-19

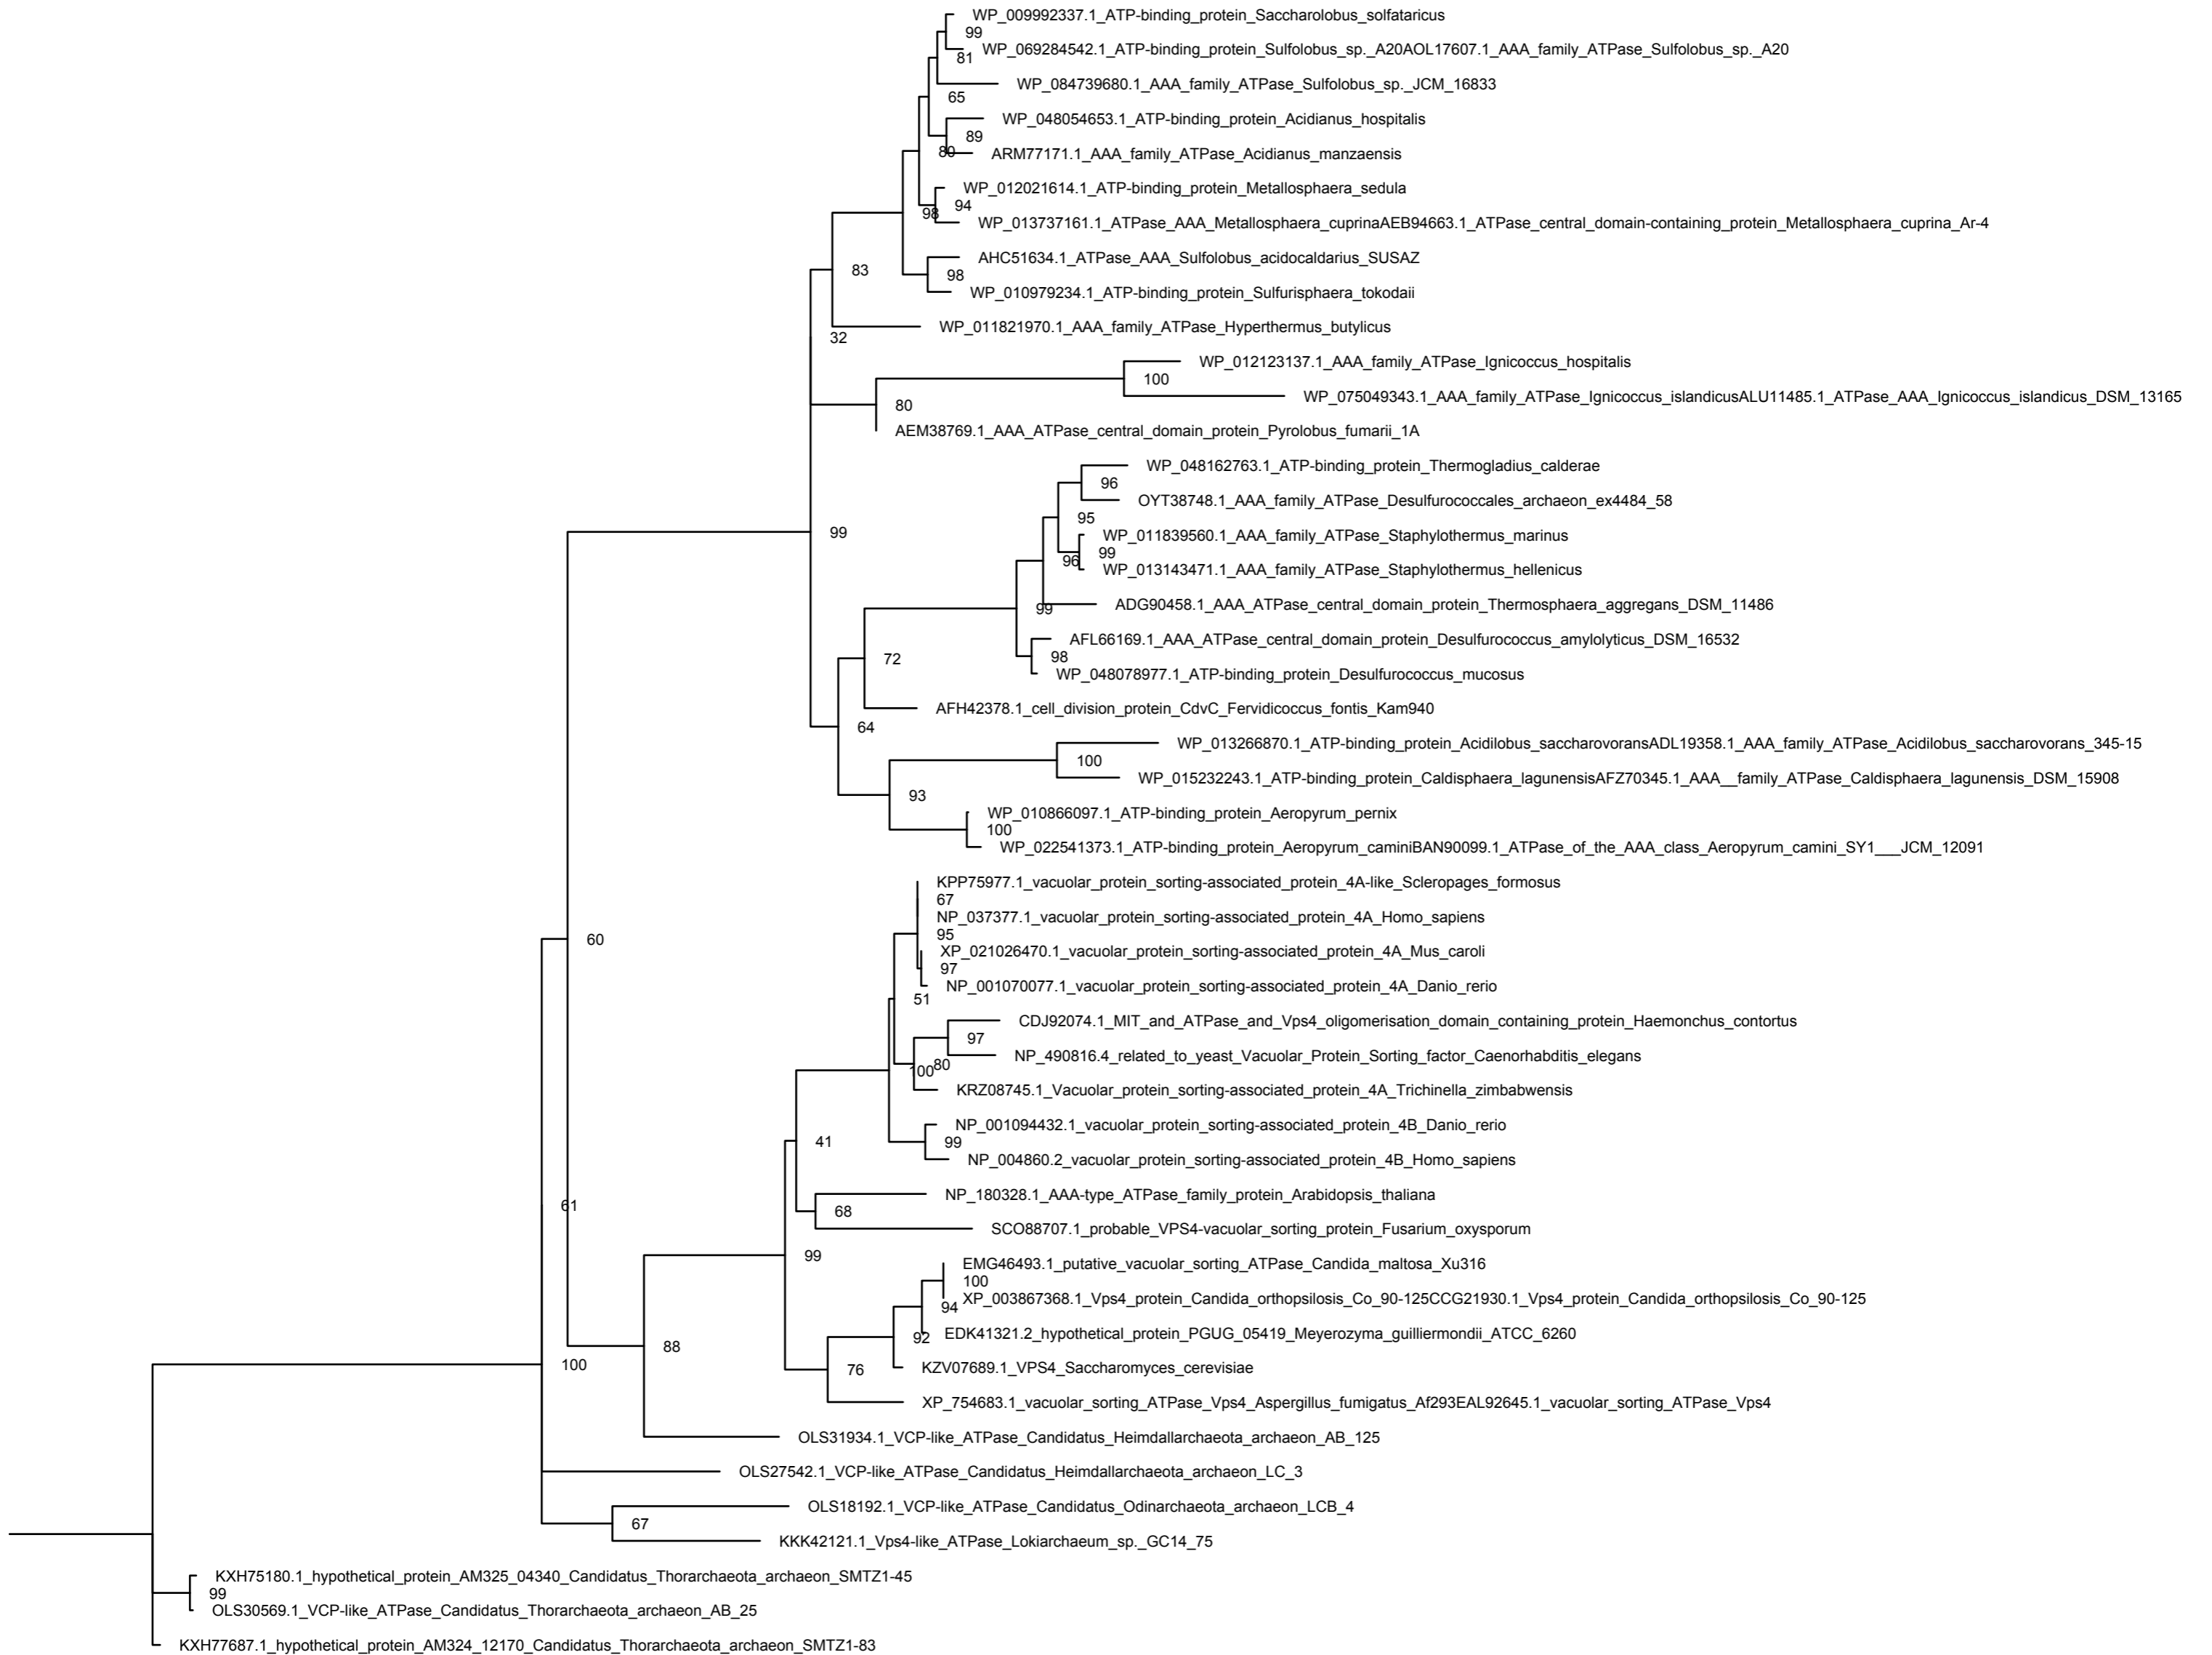

Supplement: mBio.00417-20-sf004.pdf [file mBio.00417-20-sf004.pdf]
